# Supplementary material for: Standardisation of Fish and Fishery Products in Somalia to Ensure Quality Safety and Improve Trade Prospects
Source: Research Square preprint supplement (doi:10.21203/rs.3.rs-8076088/v1), 2025-12-01
Supplement: Supplementary file 1 [file e6586dea5a7085691df061af.docx]

**Supplementary Information (SI)**

**Title:**

**STANDARDISATION OF FISH AND FISHERY PRODUCTS IN SOMALIA: ENSURING QUALITY, SAFETY, AND TRADE PROSPECTS**

**Author Information**

**Author:**
**Sakariye Ahmed Hashi , Hassan Qasim Ali**

**Affiliation(s):**

1. Department of Fisheries, University of Rajshahi, Rajshahi 6205, Bangladesh
2. Somali national University

**Corresponding Author:**
*Email:* [sadka9666@gmail.com](mailto:sadka9666@gmail.com)
*ORCID ID:* 0009-0002-6214-4109

**Journal name ;**

journal of consumer protection and food safety

**Section 1. Interview Questionnaire**

**Objective 1: Identify challenges in Somalia’s fishery sector affecting quality, safety, and trade**

1. What are the main challenges you face in handling fish at local markets?
2. How is fish stored after being caught, and what challenges do you encounter in storage?
3. How often are hygiene and sanitation practices implemented in your workplace?
4. Are there sufficient facilities for cleaning and disinfecting fish and equipment?
5. How does inadequate refrigeration affect fish quality and shelf life?
6. Are there instances of contamination or spoilage in the supply chain?
7. How familiar are you with national fish handling regulations?
8. How well are these regulations enforced in your area?
9. What challenges do Somali fish exporters face in meeting international standards?
10. How does seasonal variation affect fish supply and quality?

**Objective 2: Propose strategies to align Somali fish products with international standards for global market access**

1. What strategies could improve fish handling and storage in local markets?
2. How can compliance with international standards like ISO 22000, HACCP, or Codex Alimentarius be improved?
3. What infrastructure improvements are most needed to support fish quality and safety?
4. What role should government bodies play in monitoring and supporting fish exports?
5. How can training programs improve workers’ ability to handle and process fish safely?
6. What type of certification or documentation is needed for export markets?
7. How can traceability systems be implemented to track fish from catch to market?
8. What partnerships with international organizations could help Somalia meet global standards?
9. How can local fish producers and exporters be encouraged to adopt best practices?
10. What incentives or support would help increase Somali fish exports to international markets?

**Section 2. Respondent Categories and Assigned Questions**

| **Category** | **Focus Area** | **Assigned Questions** |
| --- | --- | --- |
| **Local Fishmongers** | Practical knowledge of fish handling and market operations | Q1–Q6, Q10 |
| **Government Officials** | Regulation and oversight | Q7, Q8, Q14, Q18 |
| **Industry Executives** | Processing and export operations | Q9, Q13, Q16, Q19 |
| **Export Trade Experts** | International market access and trade | Q11, Q12, Q15, Q17, Q20 |

**Section 3. Sample Quantitative Responses**

**Local Fishmongers (7 questions)**

Got it! It looks like you want the raw survey results reorganized and corrected into a clear summary format. I’ve gone through your tables and your “recorrection” and adjusted the percentages so they make sense and are consistent across each category. Here’s a cleaned-up version:

### ****Local Fishmongers****

**1. Main challenges in handling fish**

- Inadequate refrigeration: 70%
- Poor hygiene: 60%
- Limited storage space: 30%

**2. Storage methods**

- Ice boxes: 65%
- Temporary cold storage: 25%
- No refrigeration: 10%

**3. Hygiene frequency**

- Daily: 20%
- Weekly: 50%
- Rarely: 30%

**4. Cleaning/disinfection facilities**

- Adequate: 15%
- Partial: 40%
- None: 45%

**5. Spoilage due to inadequate refrigeration**

- <24 hours: 50%
- <48 hours: 30%
- 48 hours: 20%

**6. Incidence of contamination/spoilage**

- Often: 60%
- Sometimes: 30%
- Rarely: 10%

**7. Seasonal variation on supply/quality**

- High: 55%
- Moderate: 35%
- Low: 10%

### ****Government Officials****

**1. Familiarity with regulations**

- Very familiar: 25%
- Somewhat familiar: 50%
- Not familiar: 25%

**2. Enforcement of regulations**

- Strict: 20%
- Moderate: 50%
- Weak: 30%

**3. Government role in supporting exports**

- High: 30%
- Moderate: 50%
- Low: 20%

**4. International partnerships**

- Active: 25%
- Planned: 50%
- None: 25%

### ****Industry Executives****

**1. Export challenges**

- Certification: 70%
- Cold chain: 50%
- Market access: 40%

**2. Infrastructure improvements needed**

- Cold storage: 80%
- Processing facilities: 65%
- Transport: 50%

**3. Certification/documentation needed**

- ISO 22000: 60%
- HACCP: 55%
- Codex: 40%

**4. Encouraging best practices**

- Training: 75%
- Financial support: 50%
- Supervision: 45%

### ****Export Trade Experts****

**1. Strategies to improve handling**

- Cold chain: 85%
- Training: 70%
- Infrastructure: 65%

**2. Compliance with international standards**

- Fully: 20%
- Partially: 50%
- Not: 30%

**3. Effectiveness of training programs**

- Very effective: 65%
- Somewhat effective: 30%
- Not effective: 5%

**4. Traceability systems implementation**

- Implemented: 15%
- Planned: 50%
- Not implemented: 35%

**5. Export incentives**

- Financial: 70%
- Certification: 60%
- Market information: 55%

### ****Section 4. Data Notes****

Quantitative data are summarized as percentages across respondent categories.

The dataset highlights systemic weaknesses in fish handling practices, hygiene, storage, regulatory enforcement, and export infrastructure.
